# Supplementary material
Source: Springer Nature journal article supplement (https://www.springermedizin.de/resource/supplementary/12962_2008_76_MOESM1_ESM.pdf/9572086)
Supplement: MOESM1 [file 9572086]

- A. Households pay the full cost for each visit to the Communal Health Station or District Health Centre and for medicine prescribed by the doctor. Households that are not able to pay will not receive any services. A service is given at cost price – there is no profit. There are no exemption cards. The total annual cost for a household will depend on how many members will be ill and will visit the Communal Health Station or District Health Centre during the year.
- B. All households in the district are compulsory (obliged) to pay an annual premium to a local health care fund when crops are sold. There are no exemption cards. The fee is based on how much income the households have. The higher income, the higher the fee. Thereby all members in the household are entitled to free health care at the Communal Health Station or District Health Centre and free medicine if prescribed by the doctor. If care at higher levels is needed, the insured patient will be supported by an amount based on the cost per bed day at the District Health Centre level. The fund will be managed by the Commune People Committee (or voted representative).
- C. Each household can choose to voluntarily pay an annual premium to a local health care fund when crops are sold. The fee is based on the number of people in the household and the fee is higher for children under five and elderly over 65 because they are expected to use more health care. All persons in the household paying the fee are entitled to free health care at the Communal Health Station or District Health Centre and free medicine if prescribed by the doctor. If care at higher levels is needed, the insured patient will be supported by an amount based on the cost per bed day at the District Health Centre level. The fund will be managed by the Commune People Committee (or voted representative).
